# Supplementary material for: Integrated Transcriptome Analysis of Long Noncoding RNA and mRNA in Developing and Aging Mouse Retina
Source: Springer Nature journal article supplement (doi:10.1038/s41597-023-02562-9), 2023-09-23
Supplement: MOESM1 [file 41597_2023_2562_MOESM1_ESM.pdf]

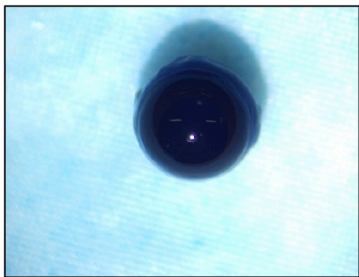

Eye enucleated

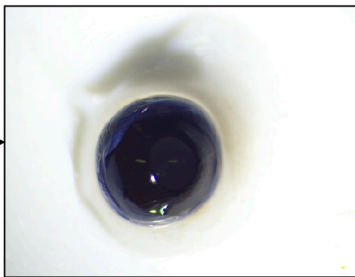

Cornea dissected

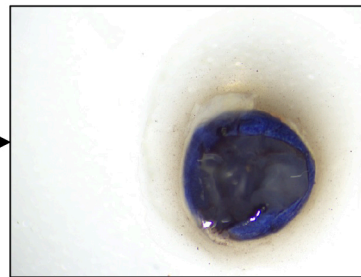

Lens and iris removed

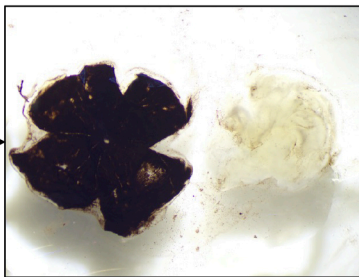

RPE-choroid-sclera and  
neuro-retina separated

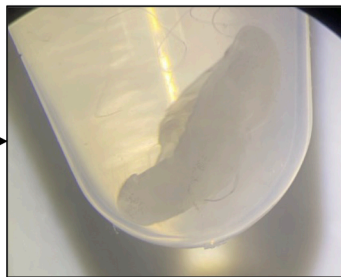

Neuro-retina without  
residual pigment

**Supplementary Figure 1. Procedures of retina collection.**

The eyes were enucleated and washed with PBS. Cornea was dissected along with limbus before removing lens and iris. Then neuro-retina was separated from RPE-choroid-sclera and washed with PBS to remove residual pigment.
